# Supplementary material for: Deterioration of Intended Target Volume Radiation Dose Due to Anatomical Changes in Patients with Head-and-Neck Cancer
Source: MDPI journal article supplement (doi:10.3390/cancers13174253), 2021-08-24
Supplement: s1 [file s1]

Supplementary material:

Supplementary Table S1: Details of patient positioning and planning CT, high and low dose clinical target volume delineation, dose prescription and planning objectives.

|                            |                                                                                                                                                                                                                                                                                                                                                                                                                                                                                                                                                                                                                                     |
|----------------------------|-------------------------------------------------------------------------------------------------------------------------------------------------------------------------------------------------------------------------------------------------------------------------------------------------------------------------------------------------------------------------------------------------------------------------------------------------------------------------------------------------------------------------------------------------------------------------------------------------------------------------------------|
| Patient positioning and CT | Patients were immobilized with a 5-point thermoplastic mask and positioned with a knee support and head rest. Each patient had a contrast enhanced planning CT with 1 x 1 x 3mm <sup>3</sup> voxel size (Somatom Sensation Open, Siemens AG, Erlangen, Germany).                                                                                                                                                                                                                                                                                                                                                                    |
| Target volume delineation  | The primary tumor and pathological nodes (GTV) were delineated based on clinical and imaging information available. A high risk CTV (CTV1) was created by expansion of GTV with 10 mm, allowing adjustment for anatomical borders. A low risk CTV (CTV2) was created around CTV1 by another expansion of 5 mm. Additionally, bilateral elective neck nodes were delineated and included in CTV2. A planning target volume (PTV) margin was constructed around all CTVs, 5 mm margin was used in patients treated before the 1 <sup>st</sup> of April 2015 (90 patients), thereafter, a PTV margin of 3mm was applied (98 patients). |
| Dose prescription          | The prescribed dose was 54.25 Gy in 35 fractions to low risk PTV (PTV2) and 70 Gy in 35 fractions to high risk PTV (PTV1), delivered using a simultaneous integrated boost technique.                                                                                                                                                                                                                                                                                                                                                                                                                                               |
| Planning requirements      | Planning objectives for optimization of PTVs were: dose to 99% of the volume ( $D_{99}$ ) > 95% and $D_1$ < 107% of prescribed dose. Dose calculation in the first 4 mm from the external contour was considered unreliable and ignored for the target volume during plan optimization and analysis.                                                                                                                                                                                                                                                                                                                                |

Supplementary Table S2: Threshold violation of 1 and 2 Gy difference of accumulated versus planned dose

|                       |                 | ETV to PTV |        | CTV to PTV |        | PTV to PTV |          | CTV to CTV |        |
|-----------------------|-----------------|------------|--------|------------|--------|------------|----------|------------|--------|
|                       |                 | 1 Gy       | 2 Gy   | 1 Gy       | 2 Gy   | 1 Gy       | 2 Gy     | 1 Gy       | 2 Gy   |
| Target 1<br>(n = 188) | D <sub>99</sub> | 15 (8%)    | 4 (2%) | 3 (2%)     | 2 (1%) | 79 (42%)   | 39 (21%) | 26 (14%)   | 8 (4%) |
|                       | D <sub>1</sub>  | 7 (4%)     | 4 (2%) | 9 (5%)     | 4 (2%) | 7 (4%)     | 3(2%)    | 6 (3%)     | 4 (2%) |
|                       |                 | ETV to PTV |        | CTV to PTV |        | PTV to PTV |          | CTV to CTV |        |
|                       |                 | 1 Gy       | 2 Gy   | 1 Gy       | 2 Gy   | 1 Gy       | 2 Gy     | 1 Gy       | 2 Gy   |
| Target 2<br>(n = 177) | D <sub>99</sub> | 23 (13%)   | 7 (4%) | 3 (2%)     | 1 (1%) | 56 (32%)   | 14 (8%)  | 15 (8%)    | 5 (3%) |
|                       | D <sub>1</sub>  | 7 (4%)     | 2 (1%) | 10 (6%)    | 2 (1%) | 5 (3%)     | 2 (1%)   | 5 (3%)     | 2 (1%) |

Supplementary Table S3a: Association of characteristics with deterioration over 1 and 2 Gy of the accumulated D<sub>99</sub>\_ETV1 dose versus the planned D<sub>99</sub>\_PTV1 dose.

| Target Volume 1                | D <sub>99</sub> (Threshold 1 Gy Deterioration) |             |          | D <sub>99</sub> (Threshold 2 Gy Deterioration) |             |          |
|--------------------------------|------------------------------------------------|-------------|----------|------------------------------------------------|-------------|----------|
| N                              | <1 Gy: 173                                     | >1 Gy: 15   | <i>p</i> | <2 Gy:184                                      | >2 Gy:4     | <i>P</i> |
| Age (years, (SD))              | 61.0 (10.5)                                    | 62.2 (14.4) | 0.681    | 61.0 (10.9)                                    | 64.0 (5.5)  | 0.588    |
| Gender (n, (%))                |                                                |             |          |                                                |             |          |
| Male                           | 121 (70)                                       | 12 (80)     | 0.559    | 131 (71)                                       | 2 (40)      | 0.582    |
| Female                         | 52 (30)                                        | 3 (20)      |          | 53 (29)                                        | 3 (60)      |          |
| Weight (kg, (SD))              | 76.1 (71.6)                                    | 77.5 (22.0) | 0.774    | 76.3 (17.7)                                    | 74.5 (30.1) | 0.843    |
| BMI (kg/m <sup>2</sup> , (SD)) | 24.9 (5.2)                                     | 24.9 (8.0)  | 0.958    | 24.8 (5.3)                                     | 26.2 (13.4) | 0.852    |
| Location (n, (%))              |                                                |             |          |                                                |             |          |
| Nasopharynx                    | 30 (17)                                        | 1 (7)       | 0.623    | 31 (17)                                        | 0 (0)       | 0.561    |
| Oroph/oral cavity              | 79 (48)                                        | 7 (47)      |          | 83 (45)                                        | 3 (75)      |          |
| Larynx/Hypoph                  | 38 (22)                                        | 5 (33)      |          | 42 (23)                                        | 1 (25)      |          |
| Other                          | 26 (15)                                        | 2 (13)      |          | 28 (15)                                        | 0 (0)       |          |
| Pathology (n, (%))             |                                                |             |          |                                                |             |          |
| Squamous cell                  | 159 (92)                                       | 15 (100)    | 0.608    | 170 (92)                                       | 4 (100)     | 1.000    |
| Other                          | 14 (8)                                         | 0 (0)       |          | 14 (8)                                         | 0 (0)       |          |
| T stage (n, (%))               |                                                |             |          |                                                |             |          |
| T0/T1/T2                       | 102 (59)                                       | 7 (47)      | 0.355    | 108 (59)                                       | 1 (25)      | 0.311    |
| T3/T4                          | 71 (41)                                        | 8 (53)      |          | 76 (41)                                        | 3 (75)      |          |
| N stage (n, (%))               |                                                |             |          |                                                |             |          |
| N0                             | 60 (35)                                        | 6 (40)      | 0.679    | 63 (34)                                        | 3 (75)      | 0.125    |
| N1-3                           | 113 (65)                                       | 9 (60)      |          | 121 (66)                                       | 1 (25)      |          |
| N side (n, (%))                |                                                |             |          |                                                |             |          |
| Unilateral                     | 60 (53)                                        | 6 (67)      | 0.505    | 66 (54)                                        | 0 (0)       | 0.459    |
| Bilateral                      | 53 (47)                                        | 3 (33)      |          | 55 (46)                                        | 1 (100)     |          |
| N largest size (cm, (SD))      | 2.3 (1.6)                                      | 2.4 (1.5)   | 0.933    | 2.4 (1.6)                                      | 1.1 (0)     | 0.439    |
| N largest size (n, (%))        |                                                |             |          |                                                |             |          |
| <3 cm                          | 77 (68)                                        | 5 (56)      | 0.473    | 81 (67)                                        | 1 (100)     | 1.000    |
| >3 cm                          | 36 (32)                                        | 4 (44)      |          | 40 (33)                                        | 0 (0)       |          |
| Dahanca (n, (%))               |                                                |             |          |                                                |             |          |
| No                             | 88 (51)                                        | 6 (40)      | 0.419    | 93 (50)                                        | 1 (25)      | 0.621    |
| Yes                            | 85 (49)                                        | 9 (60)      |          | 91 (50)                                        | 3 (75)      |          |
| Chemotherapy (n, (%))          |                                                |             |          |                                                |             |          |
| No                             | 86 (50)                                        | 10 (67)     | 0.208    | 94 (51)                                        | 2 (50)      | 1.000    |
| Yes                            | 87 (50)                                        | 5 (33)      |          | 90 (49)                                        | 2 (50)      |          |
| PTV margin (n, (%))            |                                                |             |          |                                                |             |          |
| 5 mm                           | 90 (52)                                        | 0 (0)       | <0.0001  | 90 (49)                                        | 0 (0)       | 0.122    |
| 3 mm                           | 83 (48)                                        | 15 (100)    |          | 94 (51)                                        | 4 (100)     |          |

Supplementary Table S3b: Association of characteristics with deterioration over 1 and 2 Gy of the accumulated D<sub>99</sub>\_ETV2 dose versus the planned D<sub>99</sub>\_PTV2 dose.

| Target Volume 2                  | D99 (Threshold 1 Gy Deterioration) |             |              | D99 (Threshold 2 Gy Deterioration) |             |          |
|----------------------------------|------------------------------------|-------------|--------------|------------------------------------|-------------|----------|
| N                                | <1 Gy: 154                         | >1 Gy: 23   | <i>p</i>     | <2 Gy:170                          | >2 Gy:7     | <i>p</i> |
| Age (years, (SD))                | 60.6 (10.7)                        | 62.5 (12.9) | 0.427        | 61.0 (11.1)                        | 58.4 (8.5)  | 0.558    |
| Gender ( <i>n</i> , (%))         |                                    |             |              |                                    |             |          |
| Male                             | 107 (70)                           | 19 (83)     |              | 123 (72)                           | 3 (43)      |          |
| Female                           | 47 (30)                            | 4 (17)      | 0.227        | 47 (28)                            | 4 (57)      | 0.107    |
| Weight (kg, (SD))                | 74.8 (17.3)                        | 86.5 (20.0) | <b>0.003</b> | 75.7 (17.9)                        | 89.7 (27.3) | 0.227    |
| BMI (kg/m <sup>2</sup> , (SD))   | 24.4 (5.2)                         | 27.7 (7.0)  | <b>0.007</b> | 24.6 (5.1)                         | 31.0 (10.5) | 0.160    |
| Location ( <i>n</i> , (%))       |                                    |             |              |                                    |             |          |
| Nasopharynx                      | 27 (17)                            | 2 (9)       |              | 28 (17)                            | 1 (14)      |          |
| Oroph/oral cavity                | 70 (46)                            | 12 (52)     |              | 78 (46)                            | 4 (57)      |          |
| Larynx/Hypoph                    | 36 (23)                            | 6 (26)      |              | 40 (23)                            | 2 (29)      |          |
| Other                            | 21 (14)                            | 3 (13)      | 0.749        | 24 (14)                            | 0 (0)       | 0.738    |
| Pathology ( <i>n</i> , (%))      |                                    |             |              |                                    |             |          |
| Squamous cell                    | 144 (94)                           | 22 (96)     |              | 159 (94)                           | 7 (100)     |          |
| Other                            | 10 (6)                             | 1 (4)       | 0.691        | 11 (6)                             | 0 (0)       | 1.000    |
| T stage ( <i>n</i> , (%))        |                                    |             |              |                                    |             |          |
| T0/T1/T2                         | 90 (58)                            | 12 (52)     |              | 99 (58)                            | 3 (43)      |          |
| T3/T4                            | 64 (42)                            | 11 (48)     | 0.570        | 71 (42)                            | 4 (57)      | 0.459    |
| N stage ( <i>n</i> , (%))        |                                    |             |              |                                    |             |          |
| N0                               | 51 (33)                            | 7 (30)      |              | 55 (32)                            | 3 (43)      |          |
| N1-3                             | 103 (67)                           | 16 (70)     | 0.798        | 115 (68)                           | 4 (57)      | 0.685    |
| N side ( <i>n</i> , (%))         |                                    |             |              |                                    |             |          |
| Unilateral                       | 54 (52)                            | 9 (56)      |              | 62 (54)                            | 1 (25)      |          |
| Bilateral                        | 49 (48)                            | 7 (44)      | 0.776        | 53 (46)                            | 3 (75)      | 0.341    |
| N largest size (cm, (SD))        | 2.3 (1.6)                          | 2.4 (1.5)   | 0.921        | 2.3 (1.6)                          | 2.4 (1.8)   | 0.988    |
| N largest size ( <i>n</i> , (%)) |                                    |             |              |                                    |             |          |
| <3 cm                            | 69 (67)                            | 10 (63)     |              | 77 (67)                            | 2 (50)      |          |
| >3 cm                            | 34 (33)                            | 6 (38)      | 0.724        | 38 (33)                            | 2 (50)      | 0.602    |
| Dahanca ( <i>n</i> , (%))        |                                    |             |              |                                    |             |          |
| No                               | 75 (49)                            | 10 (44)     |              | 80 (47)                            | 5 (71)      |          |
| Yes                              | 79 (51)                            | 13 (57)     | 0.640        | 90 (53)                            | 2 (29)      | 0.263    |
| Chemotherapy ( <i>n</i> , (%))   |                                    |             |              |                                    |             |          |
| No                               | 73 (47)                            | 13 (57)     |              | 83 (49)                            | 3 (43)      |          |
| Yes                              | 81 (53)                            | 10 (43)     | 0.414        | 87 (51)                            | 4 (57)      | 1.000    |
| PTV margin ( <i>n</i> , (%))     |                                    |             |              |                                    |             |          |
| 5 mm                             | 81 (53)                            | 3 (13)      |              | 84 (49)                            | 0 (0)       |          |
| 3 mm                             | 73 (47)                            | 20 (87)     | <b>0.001</b> | 86 (51)                            | 7 (100)     | 0.015    |

Supplementary Table S3c: Association of characteristics with deterioration over 1 and 2 Gy of the accumulated D<sub>1</sub>\_ETV1 dose versus the planned D<sub>1</sub>\_PTV1 dose.

| Target Volume 1                  | D1 (Threshold 1 Gy Deterioration) |             |              | D1 (Threshold 2 Gy Deterioration) |             |          |
|----------------------------------|-----------------------------------|-------------|--------------|-----------------------------------|-------------|----------|
| N                                | <1 Gy: 181                        | >1 Gy: 7    | <i>p</i>     | <2 Gy:184                         | >2 Gy:4     | <i>p</i> |
| Age (years, (SD))                | 60.9 (10.9)                       | 66.9 (4.5)  | <b>0.011</b> | 61.0 (10.9)                       | 66.3 (5.7)  | 0.337    |
| Gender ( <i>n</i> , (%))         |                                   |             |              |                                   |             |          |
| Male                             | 127 (70)                          | 6 (86)      |              | 129 (70)                          | 4 (100)     |          |
| Female                           | 54 (30)                           | 1 (14)      | 0.676        | 55 (309)                          | 0 (0)       | 0.323    |
| Weight (kg, (SD))                | 75.6 (17.7)                       | 90.6 (16.9) | <b>0.030</b> | 76.0 (17.9)                       | 86.4 (15.9) | 0.254    |
| BMI (kg/m <sup>2</sup> , (SD))   | 24.7 (5.0)                        | 28.9 (8.3)  | <b>0.048</b> | 24.8 (5.5)                        | 25.4 (5.1)  | 0.846    |
| Location ( <i>n</i> , (%))       |                                   |             |              |                                   |             |          |
| Nasopharynx                      | 29 (16)                           | 2 (29)      |              | 31 (17)                           | 0 (0)       |          |
| Oroph/oral cavity                | 85 (47)                           | 1 (14)      |              | 85 (46)                           | 1 (25)      |          |
| Larynx/Hypoph                    | 39 (22)                           | 4 (57)      |              | 40 (22)                           | 3 (75)      |          |
| Other                            | 28 (15)                           | 0 (0)       | 0.071        | 28 (15)                           | 0 (0)       | 0.089    |
| Pathology ( <i>n</i> , (%))      |                                   |             |              |                                   |             |          |
| Squamous cell                    | 167 (92)                          | 7 (100)     |              | 170 (92)                          | 4 (100)     |          |
| Other                            | 14 (8)                            | 0 (0)       | 1.000        | 14 (8)                            | 0 (0)       | 1.000    |
| T stage ( <i>n</i> , (%))        |                                   |             |              |                                   |             |          |
| T0/T1/T2                         | 108 (60)                          | 1 (14)      |              | 108 (59)                          | 1 (25)      |          |
| T3/T4                            | 73 (40)                           | 6 (86)      | <b>0.043</b> | 76 (41)                           | 3 (75)      | 0.311    |
| N stage ( <i>n</i> , (%))        |                                   |             |              |                                   |             |          |
| N0                               | 63 (35)                           | 3 (43)      |              | 65 (35)                           | 1 (25)      |          |
| N1-3                             | 118 (65)                          | 4 (57)      | 0.698        | 119 (65)                          | 3 (75)      | 1.000    |
| N side ( <i>n</i> , (%))         |                                   |             |              |                                   |             |          |
| Unilateral                       | 64 (54)                           | 2 (50)      |              | 64 (54)                           | 2 (67)      |          |
| Bilateral                        | 54 (46)                           | 2 (50)      | 1.000        | 55 (46)                           | 1 (33)      | 1.000    |
| N largest size (cm, (SD))        | 2.3 (1.6)                         | 1.5 (1.0)   | 0.289        | 2.4 (1.6)                         | 1.0 (2.0)   | 0.143    |
| N largest size ( <i>n</i> , (%)) |                                   |             |              |                                   |             |          |
| <3 cm                            | 79 (67)                           | 3 (75)      |              | 79 (66)                           | 3 (100)     |          |
| >3 cm                            | 39 (33)                           | 1 (25)      | 0.473        | 40 (34)                           | 0 (0)       | 0.550    |
| Dahanca ( <i>n</i> , (%))        |                                   |             |              |                                   |             |          |
| No                               | 90 (50)                           | 4 (57)      |              | 91 (50)                           | 3 (75)      |          |
| Yes                              | 91 (50)                           | 3 (43)      | 1.000        | 93 (50)                           | 1 (25)      | 0.621    |
| Chemotherapy ( <i>n</i> , (%))   |                                   |             |              |                                   |             |          |
| No                               | 93 (51)                           | 3 (43)      |              | 93 (51)                           | 3 (75)      |          |
| Yes                              | 88 (49)                           | 4 (57)      | 0.716        | 91 (49)                           | 1 (25)      | 0.621    |
| PTV margin ( <i>n</i> , (%))     |                                   |             |              |                                   |             |          |
| 5 mm                             | 86 (48)                           | 3 (43)      |              | 89 (48)                           | 1 (25)      |          |
| 3 mm                             | 95 (53)                           | 4 (57)      | 0.711        | 95 (52)                           | 3 (75)      | 0.622    |

Supplementary Table S3d: Association of characteristics with deterioration over 1 and 2 Gy of the accumulated D<sub>1</sub>\_ETV2 dose versus the planned D<sub>1</sub>\_PTV2 dose.

| Target Volume 2                  | D1 (Threshold 1 Gy Deterioration) |             |              | D1 (Threshold 2 Gy Deterioration) |             |          |
|----------------------------------|-----------------------------------|-------------|--------------|-----------------------------------|-------------|----------|
| N                                | <1 Gy: 170                        | >1 Gy: 7    | <i>p</i>     | <2 Gy: 175                        | >2 Gy: 2    | <i>p</i> |
| Age (years, (SD))                | 60.6 (11.1)                       | 66.8 (4.5)  | <b>0.009</b> | 60.8 (11.0)                       | 62.5 (5.0)  | 0.828    |
| Gender ( <i>n</i> , (%))         |                                   |             |              |                                   |             |          |
| Male                             | 120 (71)                          | 6 (86)      |              | 124 (71)                          | 2 (100)     |          |
| Female                           | 50 (29)                           | 1 (14)      | 0.675        | 51 (29)                           | 0 (0)       | 1.000    |
| Weight (kg, (SD))                | 75.7 (17.9)                       | 90.6 (16.9) | <b>0.032</b> | 76.1 (18.0)                       | 94.0 (19.8) | 0.164    |
| BMI (kg/m <sup>2</sup> , (SD))   | 24.7 (5.4)                        | 28.9 (8.3)  | <b>0.048</b> | 24.8 (5.6)                        | 27.6 (3.3)  | 0.480    |
| Location ( <i>n</i> , (%))       |                                   |             |              |                                   |             |          |
| Nasopharynx                      | 27 (16)                           | 2 (29)      |              | 29 (17)                           | 0 (0)       |          |
| Oroph/oral cavity                | 81 (48)                           | 1 (14)      |              | 82 (47)                           | 0 (0)       |          |
| Larynx/Hypoph                    | 38 (22)                           | 4 (57)      |              | 40 (23)                           | 2 (100)     |          |
| Other                            | 24 (14)                           | 0 (0)       | 0.082        | 24 (14)                           | 0 (0)       | 0.090    |
| Pathology ( <i>n</i> , (%))      |                                   |             |              |                                   |             |          |
| Squamous cell                    | 159 (94)                          | 7 (100)     |              | 164 (94)                          | 2 (100)     |          |
| Other                            | 11 (6)                            | 0 (0)       | 0.487        | 11 (6)                            | 0 (0)       | 1.000    |
| T stage ( <i>n</i> , (%))        |                                   |             |              |                                   |             |          |
| T0/T1/T2                         | 101 (59)                          | 1 (14)      |              | 102 (58)                          | 0 (0)       |          |
| T3/T4                            | 69 (41)                           | 6 (86)      | <b>0.043</b> | 73 (42)                           | 2 (100)     | 0.178    |
| N stage ( <i>n</i> , (%))        |                                   |             |              |                                   |             |          |
| N0                               | 51 (33)                           | 7 (30)      |              | 58 (33)                           | 0 (0)       |          |
| N1-3                             | 103 (67)                          | 16 (70)     | 0.798        | 117 (67)                          | 2 (100)     | 1.000    |
| N side ( <i>n</i> , (%))         |                                   |             |              |                                   |             |          |
| Unilateral                       | 54 (52)                           | 9 (56)      |              | 62 (54)                           | 1 (25)      |          |
| Bilateral                        | 49 (48)                           | 7 (44)      | 0.776        | 53 (46)                           | 3 (75)      | 1.000    |
| N largest size (cm, (SD))        | 2.4 (1.6)                         | 1.5 (1.0)   | 0.291        | 2.6 (1.6)                         | 1.1 (1.4)   | 0.274    |
| N largest size ( <i>n</i> , (%)) |                                   |             |              |                                   |             |          |
| <3 cm                            | 76 (66)                           | 3 (75)      |              | 77 (66)                           | 2 (100)     |          |
| >3 cm                            | 39 (34)                           | 1 (25)      | 1.000        | 40 (34)                           | 0 (0)       | 0.550    |
| Dahanca ( <i>n</i> , (%))        |                                   |             |              |                                   |             |          |
| No                               | 81 (48)                           | 4 (57)      |              | 84 (48)                           | 1 (50)      |          |
| Yes                              | 89 (52)                           | 3 (43)      | 0.712        | 91 (52)                           | 1 (50)      | 1.000    |
| Chemotherapy ( <i>n</i> , (%))   |                                   |             |              |                                   |             |          |
| No                               | 83 (49)                           | 3 (43)      |              | 85 (49)                           | 1 (50)      |          |
| Yes                              | 87 (51)                           | 4 (57)      | 1.000        | 90 (51)                           | 1 (50)      | 1.000    |
| PTV margin ( <i>n</i> , (%))     |                                   |             |              |                                   |             |          |
| 5 mm                             | 90 (53)                           | 3 (43)      |              | 92 (53)                           | 1 (50)      |          |
| 3 mm                             | 80 (47)                           | 4 (57)      | 0.709        | 83 (47)                           | 1 (50)      | 1.000    |

Supplementary Table S4: P values of the independent sample t-test evaluating differences between patients with and without dosimetric deterioration (delivered ETV doses versus planned PTV doses in TV1 and TV2 with thresholds of 1 and 2Gy dose deterioration), testing weight change and tube feeding during treatment.

|                | D99          |              | D99          |              | D1        |           | D1        |              |
|----------------|--------------|--------------|--------------|--------------|-----------|-----------|-----------|--------------|
|                | TV1(1 Gy)    | TV1(2 Gy)    | TV2(1 Gy)    | TV2(2 Gy)    | TV1(1 Gy) | TV1(2 Gy) | TV2(1 Gy) | TV2(2 Gy)    |
| $\Delta G\_w1$ | 0.151        | <b>0.007</b> | 0.685        | 0.947        | 0.764     | 0.630     | 0.702     | 0.286        |
| $\Delta G\_w2$ | <b>0.000</b> | <b>0.023</b> | 0.367        | 0.904        | 0.733     | 0.294     | 0.742     | 0.746        |
| $\Delta G\_w3$ | <b>0.006</b> | 0.242        | 0.732        | 0.986        | 0.697     | 0.262     | 0.707     | 0.844        |
| $\Delta G\_w4$ | <b>0.042</b> | 0.617        | <b>0.046</b> | <b>0.044</b> | 0.192     | 0.095     | 0.210     | <b>0.004</b> |
| $\Delta G\_w5$ | 0.082        | 0.550        | 0.099        | 0.071        | 0.262     | 0.071     | 0.289     | <b>0.004</b> |
| $\Delta G\_w6$ | 0.097        | 0.551        | 0.816        | 0.863        | 0.304     | 0.181     | 0.328     | <b>0.010</b> |
| Tube feeding   | 0.952        | 0.115        | 0.614        | 0.694        | 0.691     | 1.000     | 0.694     | 1.000        |

Supplementary Table S5: Association of clinical ART with dosimetric deterioration over 1 and 2Gy of accumulated ETV doses versus planned PTV doses, results of the Chi-Square-tests (or Fisher's exact-test in case of less than 5 events in at least one category) evaluating differences between patients with and without dosimetric deterioration.

| Clinical ART | 1 Gy Threshold               |               |              | 2 Gy Threshold               |              |       |
|--------------|------------------------------|---------------|--------------|------------------------------|--------------|-------|
|              | TV1 D <sub>99</sub> (n, (%)) |               |              | TV1 D <sub>99</sub> (n, (%)) |              |       |
|              | <1 Gy: n = 173               | >1 Gy: n = 15 | p            | <2 Gy: n = 184               | >2 Gy: n = 4 | p     |
| No           | 154 (89)                     | 10 (67)       |              | 162 (88)                     | 2 (50)       |       |
| Yes          | 19 (11)                      | 5 (33)        | <b>0.013</b> | 22 (12)                      | 2 (50)       | 0.080 |
|              | TV2 D <sub>99</sub> (n, (%)) |               |              | TV2 D <sub>99</sub> (n, (%)) |              |       |
|              | <1 Gy: n = 154               | >1 Gy: n = 23 | p            | <2 Gy: n = 170               | >2 Gy: n = 7 | p     |
| No           | 134 (87)                     | 19 (83)       |              | 147 (87)                     | 6 (86)       |       |
| Yes          | 20 (13)                      | 4 (17)        | 0.523        | 23 (13)                      | 1 (14)       | 1.000 |
|              | TV1 D <sub>1</sub> (n, (%))  |               |              | TV1 D <sub>1</sub> (n, (%))  |              |       |
|              | <1 Gy: n = 181               | >1 Gy: n = 7  | p            | <2 Gy: n = 184               | >2 Gy: n = 4 | p     |
| No           | 158 (87)                     | 6 (86)        |              | 161 (88)                     | 3 (75)       |       |
| Yes          | 23 (13)                      | 1 (14)        | 0.902        | 23 (12)                      | 1 (25)       | 0.424 |
|              | TV2 D <sub>1</sub> (n, (%))  |               |              | TV2 D <sub>1</sub> (n, (%))  |              |       |
|              | <1Gy: n=170                  | >1Gy: n=7     | p            | <2Gy: n=175                  | >2Gy: n=2    | p     |
| No           | 147 (87)                     | 6 (86)        |              | 152 (87)                     | 1 (50)       |       |
| Yes          | 23 (13)                      | 1 (14)        | 1.000        | 23 (13)                      | 1 (50)       | 0.253 |
